# Supplementary material for: A Single Base-Pair Change in 2009 H1N1 Hemagglutinin Increases Human Receptor Affinity and Leads to Efficient Airborne Viral Transmission in Ferrets
Source: PubMed Central journal article supplement (PMC3047569; doi:10.1371/journal.pone.0017616), 2011-03-02

Figure S3

A

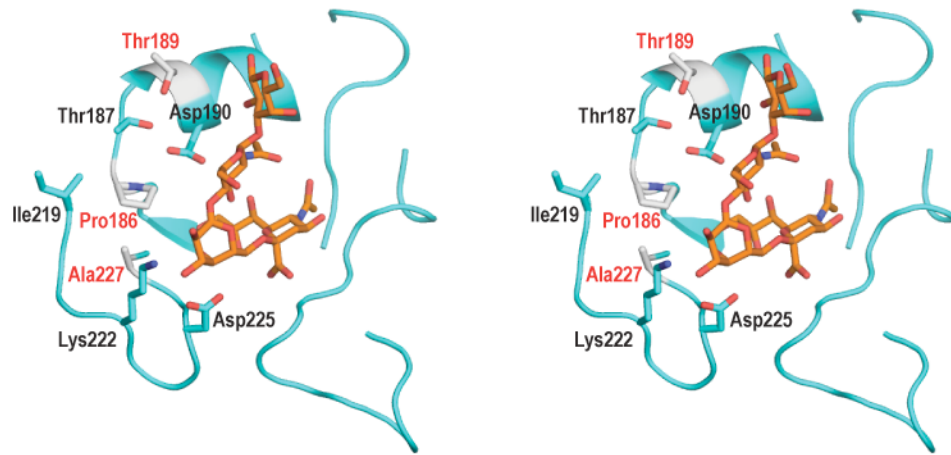

B

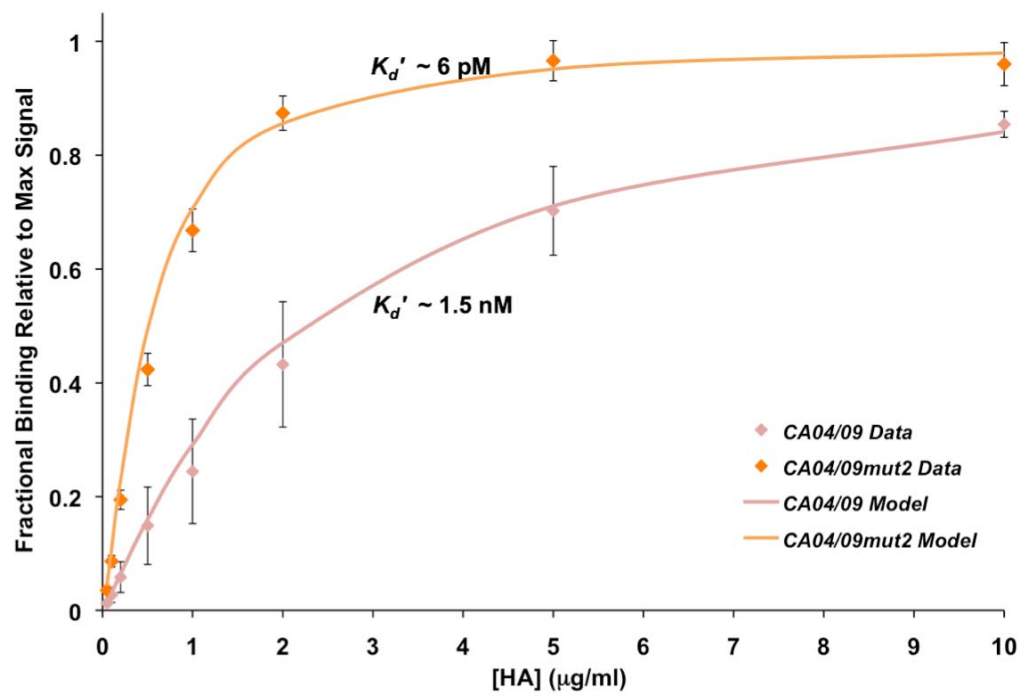

Supplement: pone.0017616.s004.pdf [file pone.0017616.s004.pdf]
